# Supplementary material for: Putative Systemic Biomarkers of Biomass Smoke-Induced Chronic Obstructive Pulmonary Disease among Women in a Rural South Indian Population
Source: Dis Markers. 2018 Nov 22;2018:4949175. doi: 10.1155/2018/4949175 (PMC6282129; doi:10.1155/2018/4949175)
Supplement: Supplementary Materials — Supplementary Table ST1: serum cytokine and chemokine concentrations in the study subjects. n = number of subjects with detectable analyte concentration in each group. Data are represented as median (25th–75th percentile) pg/ml. Supplementary Table ST2: summarized representation of the significantly different serum chemokines and cytokines between tobacco smokers with chronic obstructive pulmonary disease (TS-COPD) versus biomass smoke-exposed subjects with COPD (BMS-COPD) and TS-CONTROL versus BMS-CONTROL groups. Supplementary Table ST3: summarized representation of the significantly different serum chemokine and cytokine concentrations between TS-COPD versus TS-CONTROL and BMS-COPD versus BMS-CONTROL groups and their correlation to lung function and COPD severity. [file 4949175.f1.docx]

**Additional file**

**Putative systemic biomarkers of biomass smoke induced chronic obstructive pulmonary disease among women in a rural south Indian population**

Sangeetha Vishweswaraiah1*, Tania Ahalya Thimraj1*, Leema George1, Chaya Sindaghatta Krishnarao2, Komarla Sundararaja Lokesh2, Jayaraj Biligere Siddaiah2, Kjell Larsson3, Swapna Upadhyay3, Lena Palmberg3, Mahesh Padukudru Anand2#, Koustav Ganguly1,3#

1SRM Research Institute, SRM Institute of Science and Technology (Formerly SRM University), Chennai, 603203, India

2JSS Medical College and Hospital, JSS Academy of Higher Education and Research, Department of Pulmonary Medicine, Mysuru, India

3Work Environment Toxicology; Institute of Environmental Medicine, Karolinska Institutet; Box 287, SE-171 77 Stockholm, Sweden

*** Contributed equally;**

***# Contributed equally and corresponding authors**

| **Name** | **Email** |
| --- | --- |
| Sangeetha Vishweswaraiah | sangeethav.srm@gmail.com |
| Tania A Thimraj | taniathimraj.srm@gmail.com |
| Leema George | leemag.srm@gmail.com |
| Chaya SK | chaya.sindaghatta@gmail.com |
| Lokesh KS | kslokesh@gmail.com |
| Jayaraj BS | drjayarajbs@yahoo.com |
| Kjell Larsson | Kjell.larsson@ki.se |
| Swapna Upadhyay | swapna.upadhyay@ki.se |
| Lena Palmberg | lena.palmberg@ki.se |
| Mahesh PA | mahesh1971in@yahoo.com |
| Koustav Ganguly | koustav.ganguly@ki.se |

**Correspondence:**

**Koustav Ganguly**

Work Environment Toxicology; Institute of Environmental Medicine, Karolinska Institutet; Box
287, SE-171 77 Stockholm, Sweden; **Email:** koustav.ganguly@ki.se; Phone: +46-707646787

**Mahesh PA**

Department of Pulmonary Medicine, JSS Medical College and Hospital, JSS Academy of Higher Education and Research, Shivarathreeshwara Nagar, Mysuru, 570015, **Email:** mahesh1971in@yahoo.com; India. Phone: +91-9448044003

**Conflict of Interest:** None

This study was supported by DBT-India**,** VINNOVA and Swedish Heart Lung Foundation.

**Supplementary table ST1:** Serum cytokine and chemokine concentrations in the study subjects. n= number of subjects with detectable analyte concentration in each group. Data are represented as median (25th - 75th percentile) pg/ml

**Abbreviations: TS-COPD:** Tobacco smokers with COPD; **TS-CONTROL:** Tobacco smokers without COPD; **BMS-COPD:** Biomass smoke exposed subjects with COPD; **BMS-CONTROL:** Biomass exposed subjects without COPD; **TS-BMS-CONTROL:** No Tobacco- and no biomass smoke exposed subjects **CCL:** Chemokine (C-C motif) ligand **CX3CL1:** C-X-C Motif 3 Chemokine Ligand 1; **CXCL:** C-X-C Motif Chemokine Ligand **GM-CSF:** Granulocyte-macrophage colony-stimulating factor; **IFNG:** Interferon gamma; **IL:** Interleukin; **MIF:** Macrophage migration inhibitory factor; **TNF-A**: Tumor necrosis factor alpha.

| **Cytokine** | **TS-COPD**  **(n=23)** | **TS-CONTROL**  **(n=22)** | **BMS-COPD**  **(n=29)** | **BMS-CONTROL**  **(n=24)** | **TS-BMS-CONTROL (n=15)** |
| --- | --- | --- | --- | --- | --- |
| **CCL1** | 27.38 (24.26-44.77) | 50.87 (38.54-54.26) | 52.07 (47.91-55.33) | 54.60 (49.98-60.11) | 23.44 (22.25-25.95) |
| **CCL2** | 23.29 (16.44-32.39) | 27.14 (23.90-31.50) | 35.14 (31.75- 43.09) | 31.90 (25.80-38.36) | 57.61 (43.82-66.77) |
| **CCL3** | 10.71 (5.74-14.86) | 9.01 (6.57-11.12) | 9.21 (6.45-14.78) | 8.31 (7.02-9.93) | 5.61 (4.61-6.62) |
| **CCL7** | 22.18 (13.32-38.01) | 49.67 (27.32- 55.81) | 54.86 (45.67-63.59) | 54.85 (48.35-67.51) | 23.99 (22.79-28.02) |
| **CCL8** | 40.05 (19.34-67.39) | 61.72 (37.73-80.68) | 36.52 (31.62-60.96) | 39.84 (33.92- 44.45) | 48.85 (42.5-52.19) |
| **CCL11** | 76.24 (51.03- 108.37) | 66.67 (58.46-71.72) | 59.82 (49.39-74.48) | 68.45 (52.32-72.61) | 122.27(98.36-146.56) |
| **CCL13** | 63.28 (40.16- 111.48) | 98.83 (81.81-111.88) | 93.97 (61.04-127.75) | 82.04 (62.54-101.3) | 96.45 (84.81-107.415) |
| **CCL15** | 2979.58(1016.3-4740.21) | 8287.66 (5566.82- 10180.96) | 5977.22 (1459.25-8646.12) | 8799.35 (5885.19- 11715.51) | 3270.56 (2526.69-4118.67) |
| **CCL17** | 69.05 (39.80-155.46) | 168.52 (111.65-205.07) | 146.51 (100.24- 195.99) | 137.37 (116.46- 303.80) | 155.01 (147.55-224.51) |
| **CCL19** | 124.46 (58.30-196.74) | 204.90 (155.81- 272.63) | 195.98 (157.06- 249.15) | 197.01 (163.75- 383.16) | 252.12(211.52-28.38) |
| **Cytokine** | **TS-COPD** | **TS-CONTROL** | **BMS-COPD** | **BMS-CONTROL** | **TS-BMS-CONTROL** |
| **CCL20** | 9.97 (6.59- 15.53) | 16.89 (12.07- 23.64) | 17.52 (8.6- 20.54) | 20.64 (16.04- 25.08) | 5.54(4.61-6.04) |
| **CCL21** | 1890.92(1582.94-2705.39) | 2195.91 (1666.72- 2609.78) | 2042.55 (1655.03- 2569.38) | 2491.05 (1619.32- 2781.32) | 1992.86 (1617.84-2261.56) |
| **CCL22** | 383.12(236.3-645.64) | 720.98 (344.08- 851.95) | 566.17 (438.86- 784.15) | 656.56 (575.27- 761.05) | 549.17(429.41-601.69) |
| **CCL23** | 305.48 (210.62- 468.59) | 325.3 (254.81- 347.41) | 333.1 (265.56- 381.66) | 343.34 (303.9- 380.15) | 269.48 (181.13-295.08) |
| **CCL24** | 176.85 (115.66- 518.415) | 500.28 (278.43- 566.70) | 661.26 (357.91- 1003.77) | 528.73 (421.46- 692.83) | 207.12 (124.88-281.74) |
| **CCL25** | 380.41(283.72-432.99) | 487.35 (384.82- 609.93) | 558.81 (421.87- 662.76) | 542.34 (494.23- 689.13) | 316.77 (270.06-345.53) |
| **CCL26** | 5.03 (4.55- 9.01) | 6.66 (5.61- 8.65) | 7.66 (5.16-9.46) | 8.315 (6.59- 9.07) | 9.08(6.24-10.44) |
| **CCL27** | 928.31 (667.62- 1162.41) | 1230.33 (782.88- 1502.47) | 1024.99 (743.09- 1285.01) | 1409.14 (1179.38- 1569.95) | 775.56 (688.32-972.54) |
| **CX3CL1** | 231.98 (164.365- 411.28) | 355.36 (243.79- 397.98) | 407.02 (366.85- 576.72) | 534.84 (392.46- 634.85) | 158.38(118.56-174.68) |
| **CXCL1** | 140.47 (118.80- 277.31) | 254.04 (186.91- 294.37) | 239.77 (201.27- 327.36) | 239.17 (202.97- 283.26) | 126.37(120.41-156.47) |
| **CXCL2** | 268.42 (187.28- 397.49) | 753.47 (290.38- 857.50) | 417.89 (272.62- 559.7) | 347.89 (295.72- 540.51) | 199.75(281.83-172.33) |
| **CXCL5** | 311.27(98.06-741.31) | 783.48 (1163.51-426.4) | 1426.93 (729.78- 2140.41) | 1028.50 (736.48- 1472.09) | 575.00(332.67-990.96) |
| **CXCL6** | 42.39 (26.37- 57.02) | 62.02 (42- 67.33) | 61.23 (51.71- 80.76) | 54.32 (40.34- 69.66) | 39.23(28.9-54.415) |
| **CXCL9** | 356.22 (239.24- 518.25) | 601.8 (524.54- 701.56) | 484.78 (375.36- 689.19) | 508.25 (421.22- 730.65) | 256.71(227.55-277.51) |
| **CXCL10** | 91.55 (37.53- 177.17) | 297.36(109.75-365.21) | 133.98 (76.16- 224.97) | 230.54 (148.86- 288.28) | 42.04(34.49-55.63) |
| **Cytokine** | **TS-COPD** | **TS-CONTROL** | **BMS-COPD** | **BMS-CONTROL** | **TS-BMS-CONTROL** |
| **CXCL11** | 145.75(31.21-402.13) | 61.07 (47.36- 75.20) | 46.74 (25.99- 67.04) | 54.27 (40.3- 66.08) | 189.05 (160.16-213.18) |
| **CXCL12** | 659.64 (513.46- 885.92) | 729.7 (524.4- 819.71) | 591.91 (431.81- 772.46) | 551.80 (464.45- 786.11) | 931.03(723.13-1104.08) |
| **CXCL13** | 31.02 (15.64- 55.50) | 33.67 (27.24- 43.82) | 26.03 (17.92- 34.85) | 37.14 (24.23- 44.64) | 16.38(13.13-21.36) |
| **CXCL16** | 367.67 (275.23- 564.61) | 487.41 (304.69- 551.23) | 498.14 (369.53- 607.11) | 571.45 (412.07- 622.12) | 246.07 (201.70-314.75) |
| **GM-CSF** | Not detectable | Not detectable | Not detectable | Not detectable | Not detectable |
| **IFNG** | 1.43 (1.05- 35.63) | 47.92 (28.52- 59.58) | 49.75 (42.35- 62.2) | 55.15 (45.15- 66.09) | 1.31(1.22-1.42) |
| **IL-1B** | 5.99 (2.79- 7.51) | 6.50 (3.68- 11.77) | 2.34 (2.03- 5.10) | 2.85 (2.32- 3.62) | 6.8(6.18-8.18) |
| **IL-2** | 4.4 (2.95- 10.09) | 12.3 (5.82- 15.30) | 14.83 (12.3- 17.97) | 15.78 (13.41- 20.24) | 4.17(3.84-4.73) |
| **IL-4** | 7.37 (5.87- 26.53) | 27.83 (24.15- 30.49) | 26.53 (22.35- 29.72) | 28.79 (27.83- 30.94) | 6.47(5.82-7.33) |
| **IL-6** | 16.92 (6.26- 46.84) | 12.59 (10.22- 13.81) | 15.4 (13.27- 17.22) | 16.01 (12.59- 22.1) | 9.63(8.52-10.17) |
| **IL-8** | 24.59 (14.33- 72.93) | 21.12 (12- 27.85) | 25.94 (18.92- 45.83) | 24.19 (20.52- 30.31) | 17.28(12.51-18.51) |
| **IL-10** | 22.365 (12.71- 29.65) | 27.26 (23.10- 31.81) | 27.79 (23.23- 30.49) | 26.76 (25.34- 38.32) | 36.64(31.48-40.8) |
| **IL-16** | 329.73 (232.87- 543.43) | 846.38 (397.30- 1282.01) | 555.57 (358.15- 949.65) | 842.70 (402.66- 1060.21) | 156.08 (170.15-129.74) |
| **MIF** | 2489.02 (862.48- 4423.36) | 14115.77 (2950.2- 17033.25) | 12089.63 (3528.79- 21472.19) | 15392.62 (6134.61- 18643.275) | 1344.22(564.61- 1825.88) |
| **TNF-A** | 13.2 (11.50- 19.16) | 21.12 (16.59- 24.58) | 21.44 (16.28- 27.36) | 22.16 (21.04-24.50) | 11.15(10.20-12.65) |

**Supplementary table ST2:** Summarized representation of the significantly different serum chemokines and cytokines between tobacco smokers with chronic obstructive pulmonary disease (TS-COPD) versus biomass smoke exposed subjects with COPD (BMS-COPD) and TS-CONTROL versus BMS-CONTROL groups.

**Abbreviations: TS-COPD:** Tobacco smokers with COPD; **TS-CONTROL:** Tobacco smokers without COPD; **BMS-COPD:** Biomass smoke exposed subjects with COPD; **BMS-CONTROL:** Biomass smoke exposed without COPD; **TS-BMS-CONTROL:** No Tobacco smoke no biomass exposed subjects;

Concentrations are represented as [median (25th-75th percentile] pg/ml. p≤0.01 was considered as statistically significant.

| **Cytokine** | **TS-COPD**  **(pg/ml)** | **BMS-COPD**  **(pg/ml)** | | | **TS-BMS-CONTROL**  **(pg/ml)** | | **Kruskal-Wallis**  **p value** | | **Mann-Whitney**  **[TS-COPD**  **Versus**  **BMS-COPD]**  **p value** |
| --- | --- | --- | --- | --- | --- | --- | --- | --- | --- |
| **CCL1** | 27.38 (24.26-44.77) | 52.07 (47.91-55.33) | | | 23.44 (22.25-25.95) | | ≤0.001 | | ≤0.001 |
| **CCL2** | 23.29 (16.44-32.39) | 35.14 (31.75- 43.09) | | | 57.61 (43.82-66.77) | | ≤0.001 | | ≤0.01 |
| **CCL7** | 22.18 (13.32-38.01) | 56.76 (45.67-64.20) | | | 23.99 (22.79-28.02) | | ≤0.001 | | ≤0.001 |
| **CCL24** | 176.85 (115.66- 518.42) | 661.26 (357.91- 1003.77) | | | 207.12 (124.88-281.74) | | ≤0.001 | | ≤0.01 |
| **CCL25** | 380.41 (283.72-432.99) | 558.81 (421.87- 662.76) | | | 316.77 (270.06-345.53) | | ≤0.001 | | ≤0.001 |
| **CX3CL1** | 231.98 (164.365- 411.28) | 407.02 (366.85-576.72) | | | 158.38 (118.56-174.68) | | ≤0.001 | | ≤0.001 |
| **CXCL2** | 268.42 (187.28- 397.49) | 417.89 (272.62-559.7) | | | 199.75 (281.83-172.33) | | ≤0.001 | | ≤0.01 |
| **CXCL5** | 311.27 (98.06-741.31) | 1426.93 (729.78-2140.41) | | | 575.00 (332.67-990.96) | | ≤0.001 | | ≤0.001 |
| **CXCL6** | 42.39 (26.37- 57.02) | 61.23 (51.71-80.76) | | | 39.23 (28.9-54.415) | | ≤0.01 | | ≤0.01 |
| **CXCL11** | 145.75(31.21-402.13) | 46.74 (25.99-67.04) | | | 189.05 (160.16-213.18) | | ≤0.001 | | ≤0.01 |
| **IFNG** | 1.43 (1.05-35.63) | 49.75 (42.35-62.2) | | | 1.31 (1.22-1.42) | | ≤0.001 | | <0.001 |
| **IL-2** | 4.4 (2.95- 10.09) | 14.83 (12.3-17.97) | | | 4.17 (3.84-4.73) | | ≤0.001 | | ≤0.001 |
| **IL-4** | 7.23 (5.34- 24.81) | 26.53 (22.35-29.72) | | | 6.47 (5.82-7.33) | | ≤0.001 | | ≤0.01 |
| **MIF** | 2063.61 (724.05-4329.13) | 12089.63 (3528.79- 21472.19) | | | 1344.22 (564.61- 1825.88) | | ≤0.001 | | ≤0.01 |
| **TNF-A** | 13.2 (11.49- 19.16) | 21.44 (16.28- 27.36) | | | 11.15 (10.20-12.65) | | ≤0.001 | | ≤0.001 |
|  | | | | | | | | | |
| **Cytokine** | **TS-CONTROL**  **(pg/ml)** | | **BMS-CONTROL**  **(pg/ml)** | **TS-BMS-CONTROL**  **(pg/ml)** | | **Kruskal-Wallis**  **p value** | | **Mann-Whitney**  **[TS-CONTROL**  **Versus**  **BMS- CONTROL]**  **p value** | |
| **CX3CL1** | 355.36 (243.79- 397.98) | | 534.84 (392.46- 634.85) | 158.38 (118.56-174.68) | | ≤0.001 | | ≤0.001 | |
| **IL-1B** | 6.50 (3.68- 11.77) | | 2.85 (2.32- 3.62) | 6.8 (6.18-8.18) | | ≤0.01 | | ≤0.01 | |
| **IL-2** | 12.3 (5.82- 15.30) | | 15.78 (13.41- 20.24) | 4.17 (3.84-4.73) | | ≤0.001 | | ≤0.01 | |
| **IL-6** | 12.59 (10.22-13.81) | | 16.01 (12.59- 22.1) | 9.63 (8.52-10.17) | | ≤0.001 | | ≤0.01 | |

|  | **TS-COPD** | **TS-CONTROL** | **TS-BMS-CONTROL** | **Kruskal-Wallis** | **Mann-Whitney U** | **Spearman’s correlation** | | | | |
| --- | --- | --- | --- | --- | --- | --- | --- | --- | --- | --- |
|  | **(pg/ml)** | **(pg/ml)** | **(pg/ml)** | **p value** | **p value** | **FEV1** | | **FEV1/FVC** | | **COPD severity** |
| **CCL1** | 27.38 (24.26-44.77) | 50.87 (38.54-54.26) | 23.44 (25.95- 22.26) | ≤0.001 | ≤0.001 | ns | | r=0.365  p≤0.01 | | ns |
| **CCL7** | 22.18 (13.32-38.00) | 49.66(27.315-55.81) | 23.99(28.02-22.79) | ≤0.01 | ≤0.01 | ns | | ns | | ns |
| **CCL15** | 2979.58  ( 1016.3 -4740.20) | 8287.66 (5566.82-10180.96) | 3270.56 (4118.67-2526.68) | ≤0.01 | ≤0.001 | r=0.43  p≤0.01 | | r=0.419  p≤0.01 | | ns |
| **CCL17** | 69.05 (39.80-155.46) | 168.52 (111.65-205.07) | 155.01 (224.51-147.55) | ≤0.001 | ≤0.01 | ns | | ns | | ns |
| **CCL19** | 124.46 (58.29-196.73) | 204.90 (155.81-272.63) | 252.12 (281.37-211.52) | ≤0.01 | ≤0.01 | r=0.365  p≤0.01 | | r=0.363  p≤0.01 | | ns |
| **CXCL2** | 268.42(187.28-397.49) | 753.46 (290.37-857.49) | 199.75(281.82-172.32) | ≤0.01 | ≤0.01 | ns | | ns | | ns |
| **CXCL9** | 356.22 (239.24-518.25) | 601.80 (524.54-701.57) | 256.71(277.51-227.55) | ≤0.01 | ≤0.01 | ns | | ns | | ns |
| **IFN-G** | 1.43 (1.05-35.63) | 47.92 (28.52-59.58) | 1.31 (1.42-1.21) | ≤0.001 | ≤0.01 | ns | | ns | | r=-0.578  p≤0.01 |
| **MIF** | 2063.61 (724.04-4329.13) | 14115.77(2950.2-17033.25) | 1344.22(1825.87-564.61 | ≤0.001 | ≤0.01 | ns | | ns | | r=-0.613  p≤0.01 |
|  | **BMS-COPD** | **BMS-CONTROL** | **TS-BMS-CONTROL** | **Kruskal-Wallis** | **Mann-Whitney U** | **Spearman’s correlation** | | | | |
| **CCL15** | 5977.22 (1459.25-8646.12) | 8799.35 (5885.19-11715.51) | 3270.56 (4118.67-2526.68) | ≤0.001 | ≤0.01 | ns | ns | | ns | |
| **CCL27** | 1024.99 (743.09-1285.01) | 1409.14 (1179.38-1569.95) | 593.96 (516.40-1028.81) | ≤0.001 | ≤0.001 | ns | ns | | ns | |
| **CXCL13** | 26.03 (17.92-34.85) | 37.14 (24.24-44.64) | 22.77 (19.62-29.48) | ≤0.001 | ≤0.01 | ns | ns | | ns | |

**Supplementary table ST3:** Summarized representation of the significantly different serum chemokine and cytokine concentrations between TS-COPD versus TS-CONTROL and BMS-COPD versus BMS-CONTROL groups and their correlation to lung function and COPD severity. **Abbreviations:** **COPD:** Chronic obstructive pulmonary disease; **TS-CONTROL:** Tobacco smokers without COPD; **BMS CONTROL:** Biomass smoke exposed without COPD; **TS-BMS-CONTROL:** No Tobacco- and no biomass smoke exposed subjects; **FEV1-post:** Forced expiratory volume 1 second (post- bronchodilator challenge); **FVC:** Forced vital capacity. p<0.05 was considered as statistically significant, **ns:** not significant

Concentrations are represented as [median (25th-75th percentile] pg/ml. p≤0.01 was considered as statistically significant.
